# Supplementary material
Source: PubMed Central journal article supplement (PMC11386391)
Supplement: PBI-17-1751-s001.pdf [file PBI-17-1751-s001.pdf]

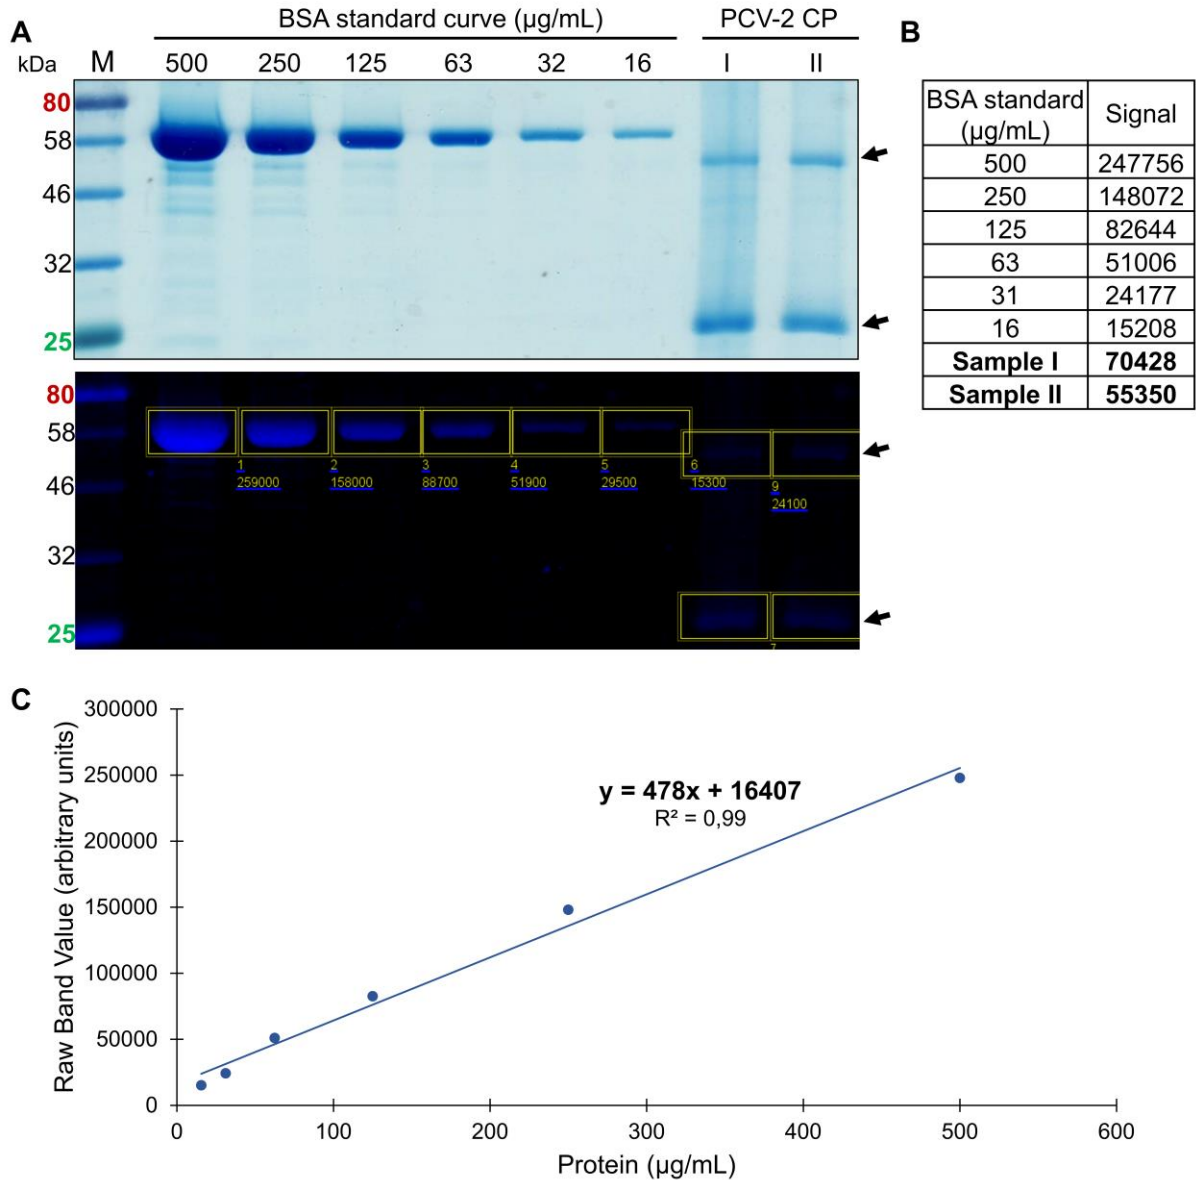

**Figure S1: Quantification of plant-produced PCV-2 CP (27 kDa).**

A - Two independently expressed and partially purified recombinant 27 kDa PCV-2 CP samples I and II resolved on Coomassie Blue stained SDS-PAGE for densitometric analysis with Image Studio Lite software (Version 5.2). Equal volume of BSA protein standard and samples were loaded per well. Amount of BSA (µg/mL) per well is indicated above each lane. B – Raw band value of independently produced PCV-2 CP samples for protein quantification. C – Densitometry analysis with  $R^2$  value and equation used for quantification of recombinant PCV-2 CP. Molecular weight marker (M).
