# Supplementary material
Source: PubMed Central journal article supplement (PMC11386391)
Supplement: PBI-17-1751-s002.pdf [file PBI-17-1751-s002.pdf]

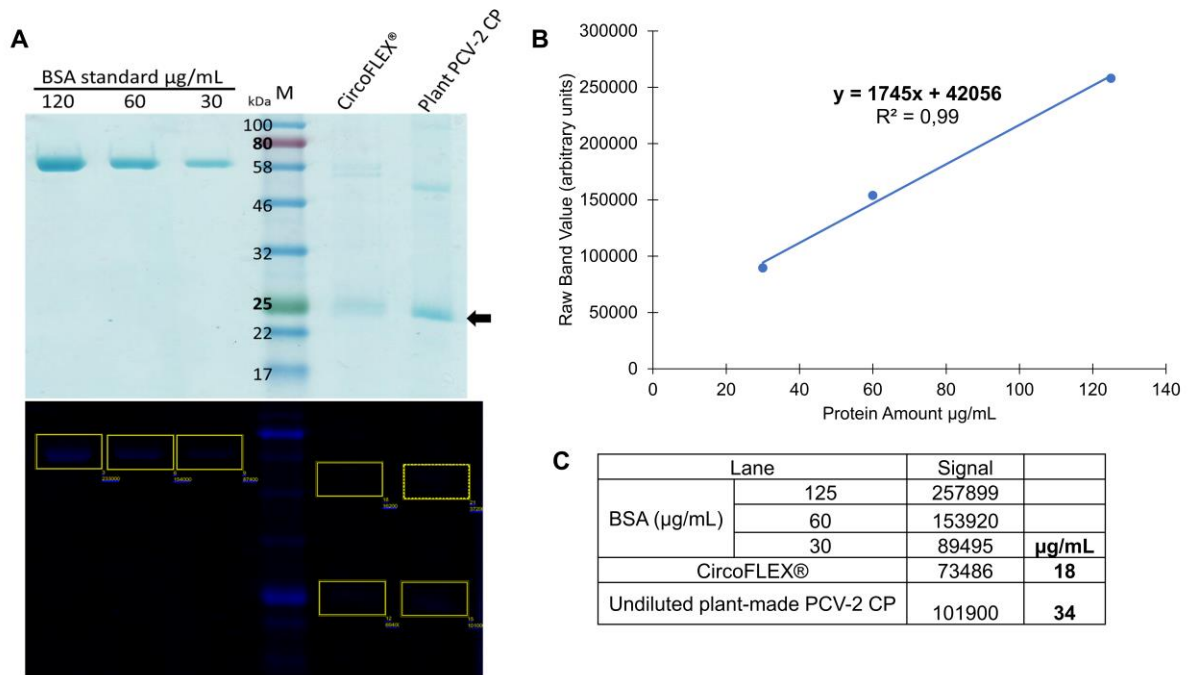

**Figure S2: Quantification of Ingelvac CircoFLEX® commercial vaccine and plant-produced PCV-2 CP (27 kDa).**

A - CircoFLEX® commercial subunit-based vaccine and plant-produced partially purified on a sucrose gradient recombinant PCV-2 CP sample was resolved on Coomassie Blue-stained SDS-PAGE with BSA protein standard for densitometric analysis with Image Studio Lite software (Version 5.2). B – Densitometry analysis with  $R^2$  value and equation used for quantification of Ingelvac CircoFLEX® and plant-produced PCV-2 CP. C – Table with raw band value of Ingelvac CircoFLEX® and plant-produced PCV-2 CP samples for protein quantification. Molecular weight marker (M).
