# Supplementary material
Source: PubMed Central journal article supplement (PMC11386391)
Supplement: PBI-17-1751-s003.pdf [file PBI-17-1751-s003.pdf]

| Protein Rank               | Description                                                        | Best score | Unique peptides | AA's in protein | Protein DB number |
|----------------------------|--------------------------------------------------------------------|------------|-----------------|-----------------|-------------------|
| <b>27 kDa protein band</b> |                                                                    |            |                 |                 |                   |
| 1                          | PCV2 Capsid protein OS=Porcine circovirus 2                        | 727,80     | 22              | 233             | 26158             |
| 2                          | PIG Uncharacterized protein OS= <i>S. scrofa</i>                   | 481,20     | 6               | 573             | 10063             |
| 3                          | PIG Trypsin OS= <i>S. scrofa</i>                                   | 631,90     | 4               | 231             | 1364              |
| 3                          | PIG Uncharacterized protein OS= <i>S. scrofa</i>                   | 631,90     | 4               | 231             | 1364              |
| 4                          | PIG Uncharacterized protein OS= <i>S. scrofa</i>                   | 384,00     | 3               | 580             | 8503              |
| 6                          | PIG Uncharacterized protein OS= <i>S. scrofa</i>                   | 383,20     | 2               | 629             | 11836             |
| <b>54 kDa protein band</b> |                                                                    |            |                 |                 |                   |
| 1                          | PCV2 Capsid protein OS=Porcine circovirus 2                        | 545,20     | 16              | 233             | 26158             |
| 2                          | PIG Trypsin OS= <i>S. scrofa</i>                                   | 409,90     | 4               | 231             | 1364              |
| 2                          | PIG Uncharacterized protein OS= <i>S. scrofa</i>                   | 409,90     | 4               | 231             | 1364              |
| 3                          | PIG Uncharacterized protein OS= <i>S. scrofa</i>                   | 344,80     | 5               | 573             | 10063             |
| 4                          | PIG Uncharacterized protein OS= <i>S. scrofa</i>                   | 507,20     | 3               | 610             | 17983             |
| 5                          | PIG Uncharacterized protein OS= <i>S. scrofa</i>                   | 307,30     | 3               | 475             | 11229             |
| 6                          | PIG ATP synthase subunit alpha, mitochondrial OS= <i>S. scrofa</i> | 186,10     | 2               | 553             | 145               |

**Table S1: Protein identities from 27 and 54 kDa SDS-PAGE gel band analyses.**

Table shows top six returned identities of the 27 and 54 kDa bands excised from SDS-PAGE gel and fragmented by trypsin digestion. The peptide solution was separated using HPLC system and analysed using a mass spectrometer. The samples were cross-examined against a merged *N. benthamiana*, *A. tumefaciens*, *S. scrofa* and virus proteome database. Protein description with species origin (OS), best score, number of unique peptides, number of amino acids in protein and the UniProt protein data base numbers are given. The PIG trypsin from *S. scrofa* is likely an artefact from the trypsin digestion.
